# Supplementary material
Source: publisher figshare collection journal article supplement (https://gsajournals.figshare.com/articles/dataset/_/7223579)
Supplement: Supplementary file 1 [file 1]

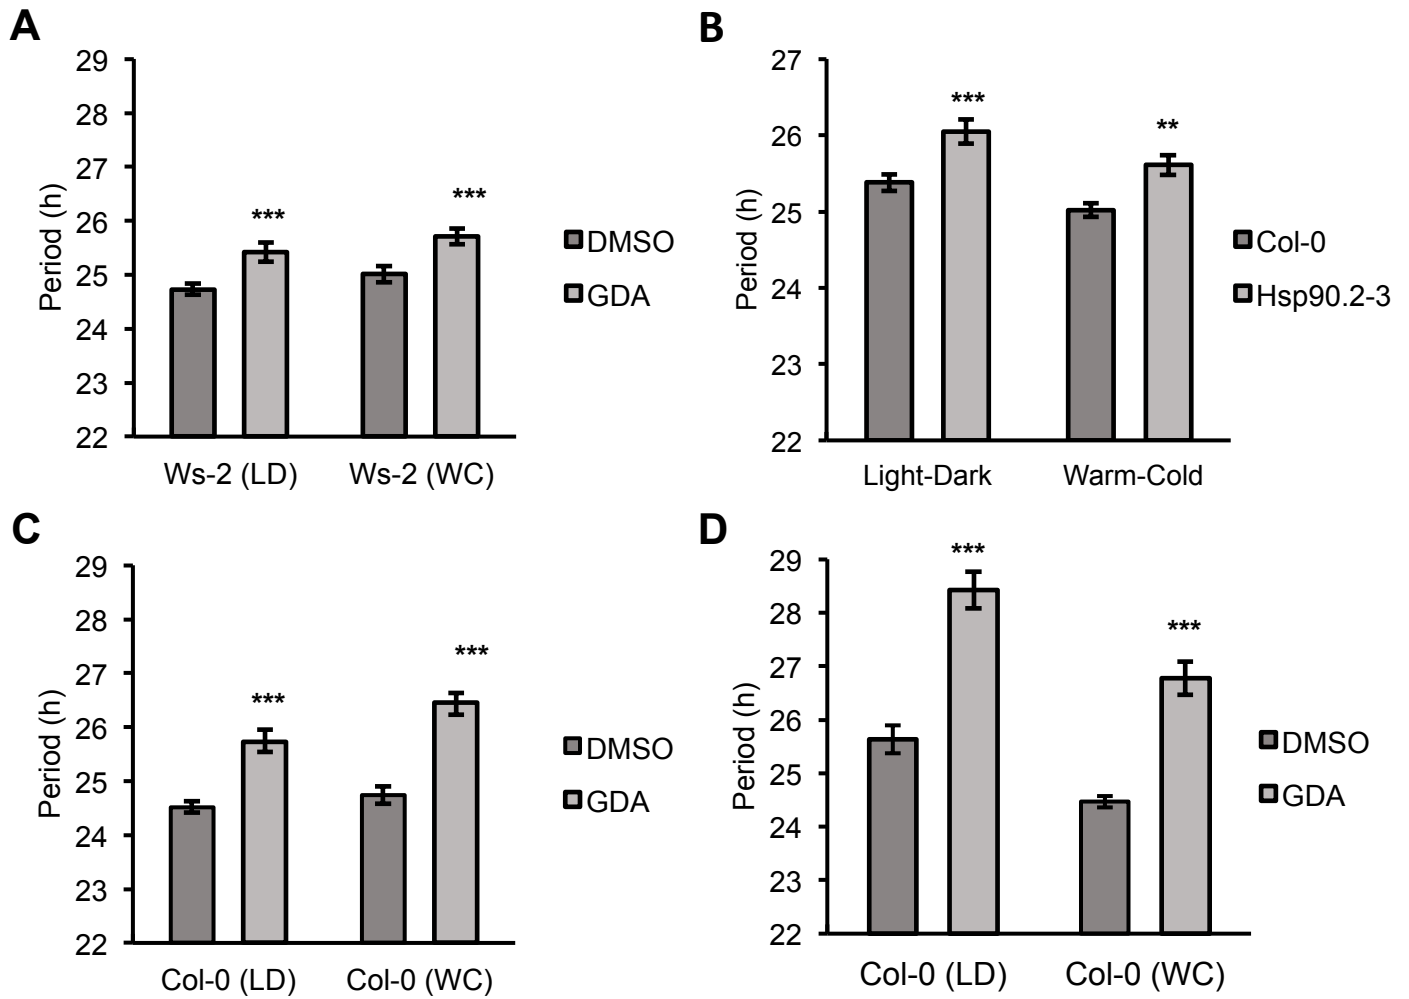

**Supplementary Figure 1 – The *hsp90.2-3* and GDA period lengthening effects are not accession or reporter gene specific.** Period estimates of the free-running profile of (A) *CAB2::LUC* in the Ws-2 background, (B) *GI::LUC* in the Col-0 and Col-0 *hsp90.2-3* background, and (C) *CCA1::LUC* and (D) *TOC1::LUC* in the Col-0 background. Plants were entrained under light-dark (LD) or warm-cold (WC) cycles before being released into free-running conditions. \*\*  $p < 0.01$  and \*\*\*  $p < 0.001$  Where stated, plants were treated with or without 2  $\mu$ M geldanamycin upon transfer to free-running conditions. Error bars represent SEM.
