# Supplementary material
Source: publisher figshare collection journal article supplement (https://gsajournals.figshare.com/articles/dataset/_/7223579)
Supplement: Supplementary file 2 [file 1]

**Supplementary Table 1 – The average change in period length when treated with 2  $\mu$ M geldanamycin in *Ws-2 CCR2::LUC* and *gi-11 CCR2::LUC* lines.** Significance was determined with a one-tail T test. n.s highlights no significance, \*  $p < 0.05$ , \*\*  $p < 0.01$  and \*\*\*  $p < 0.001$ . LD, light-dark cycles. N = 48 rhythmic plants, aside from *gi-11* GDA treated entrained under LD where n = 30 rhythmic plants.

| <b>Genotype</b>        | <b>Entrainment Condition</b> | <b><math>\Delta</math>Period Difference</b> | <b>Significance</b> |
|------------------------|------------------------------|---------------------------------------------|---------------------|
| <i>Ws-2 CCR2::LUC</i>  | LD                           | 1.27 $\pm$ 0.09                             |                     |
| <i>gi-11 CCR2::LUC</i> | LD                           | 1.32 $\pm$ 0.10                             | n.s                 |
| <i>Ws-2 CCR2::LUC</i>  | WC                           | 1.51 $\pm$ 0.11                             |                     |
| <i>gi-11 CCR2::LUC</i> | WC                           | 1.29 $\pm$ 0.09                             | n.s                 |
