# Supplementary material
Source: publisher figshare collection journal article supplement (https://gsajournals.figshare.com/articles/dataset/_/7223579)
Supplement: Supplementary file 3 [file 1]

**Supplementary Table 2 – The average change in period length when treated with GDA in the *Ws-2* and *ztl* mutants backgrounds harboring *CAB2::LUC*.** Significance was calculated with a one-tail T test. N.S highlights no significance found, \*  $p < 0.05$ , \*\*  $p < 0.01$ , \*\*\*  $p < 0.001$ . LD: light-dark, WC: warm-cold. n = 48 rhythmic plants.

| Genotype                | Entrainment Condition | $\Delta$ Period Difference | Significance |
|-------------------------|-----------------------|----------------------------|--------------|
| <i>Ws-2 CAB2::LUC</i>   | LD                    | $0.98 \pm 0.08$            |              |
| <i>ztl-21 CAB2::LUC</i> | LD                    | $0.89 \pm 0.06$            | n.s          |
| <i>ztl-23 CAB2::LUC</i> | LD                    | $1.31 \pm 0.08$            | **           |
| <i>ztl-24 CAB2::LUC</i> | LD                    | $0.81 \pm 0.06$            | n.s          |
| <i>ztl-25 CAB2::LUC</i> | LD                    | $1.08 \pm 0.06$            | n.s          |
| <i>ztl-26 CAB2::LUC</i> | LD                    | $1.21 \pm 0.10$            | n.s          |
| <i>ztl-28 CAB2::LUC</i> | LD                    | $2.06 \pm 0.25$            | ***          |
| <i>ztl-29 CAB2::LUC</i> | LD                    | $1.35 \pm 0.07$            | ***          |
| <i>ztl-30 CAB2::LUC</i> | LD                    | $0.64 \pm 0.2$             | n.s          |
| <i>Ws-2 CAB2::LUC</i>   | WC                    | $0.97 \pm 0.06$            |              |
| <i>ztl-21 CAB2::LUC</i> | WC                    | $1.29 \pm 0.08$            | ***          |
| <i>ztl-23 CAB2::LUC</i> | WC                    | $1.47 \pm 0.10$            | ***          |
| <i>ztl-24 CAB2::LUC</i> | WC                    | $1.16 \pm 0.11$            | n.s          |
| <i>ztl-25 CAB2::LUC</i> | WC                    | $1.57 \pm 0.10$            | ***          |
| <i>ztl-26 CAB2::LUC</i> | WC                    | $1.45 \pm 0.14$            | ***          |
| <i>ztl-28 CAB2::LUC</i> | WC                    | $1.17 \pm 0.07$            | **           |
| <i>ztl-29 CAB2::LUC</i> | WC                    | $1.31 \pm 0.09$            | ***          |
| <i>ztl-30 CAB2::LUC</i> | WC                    | $1.18 \pm 0.07$            | **           |
