# Supplementary material
Source: publisher figshare collection journal article supplement (https://gsajournals.figshare.com/articles/dataset/_/7223579)
Supplement: Supplementary file 4 [file 1]

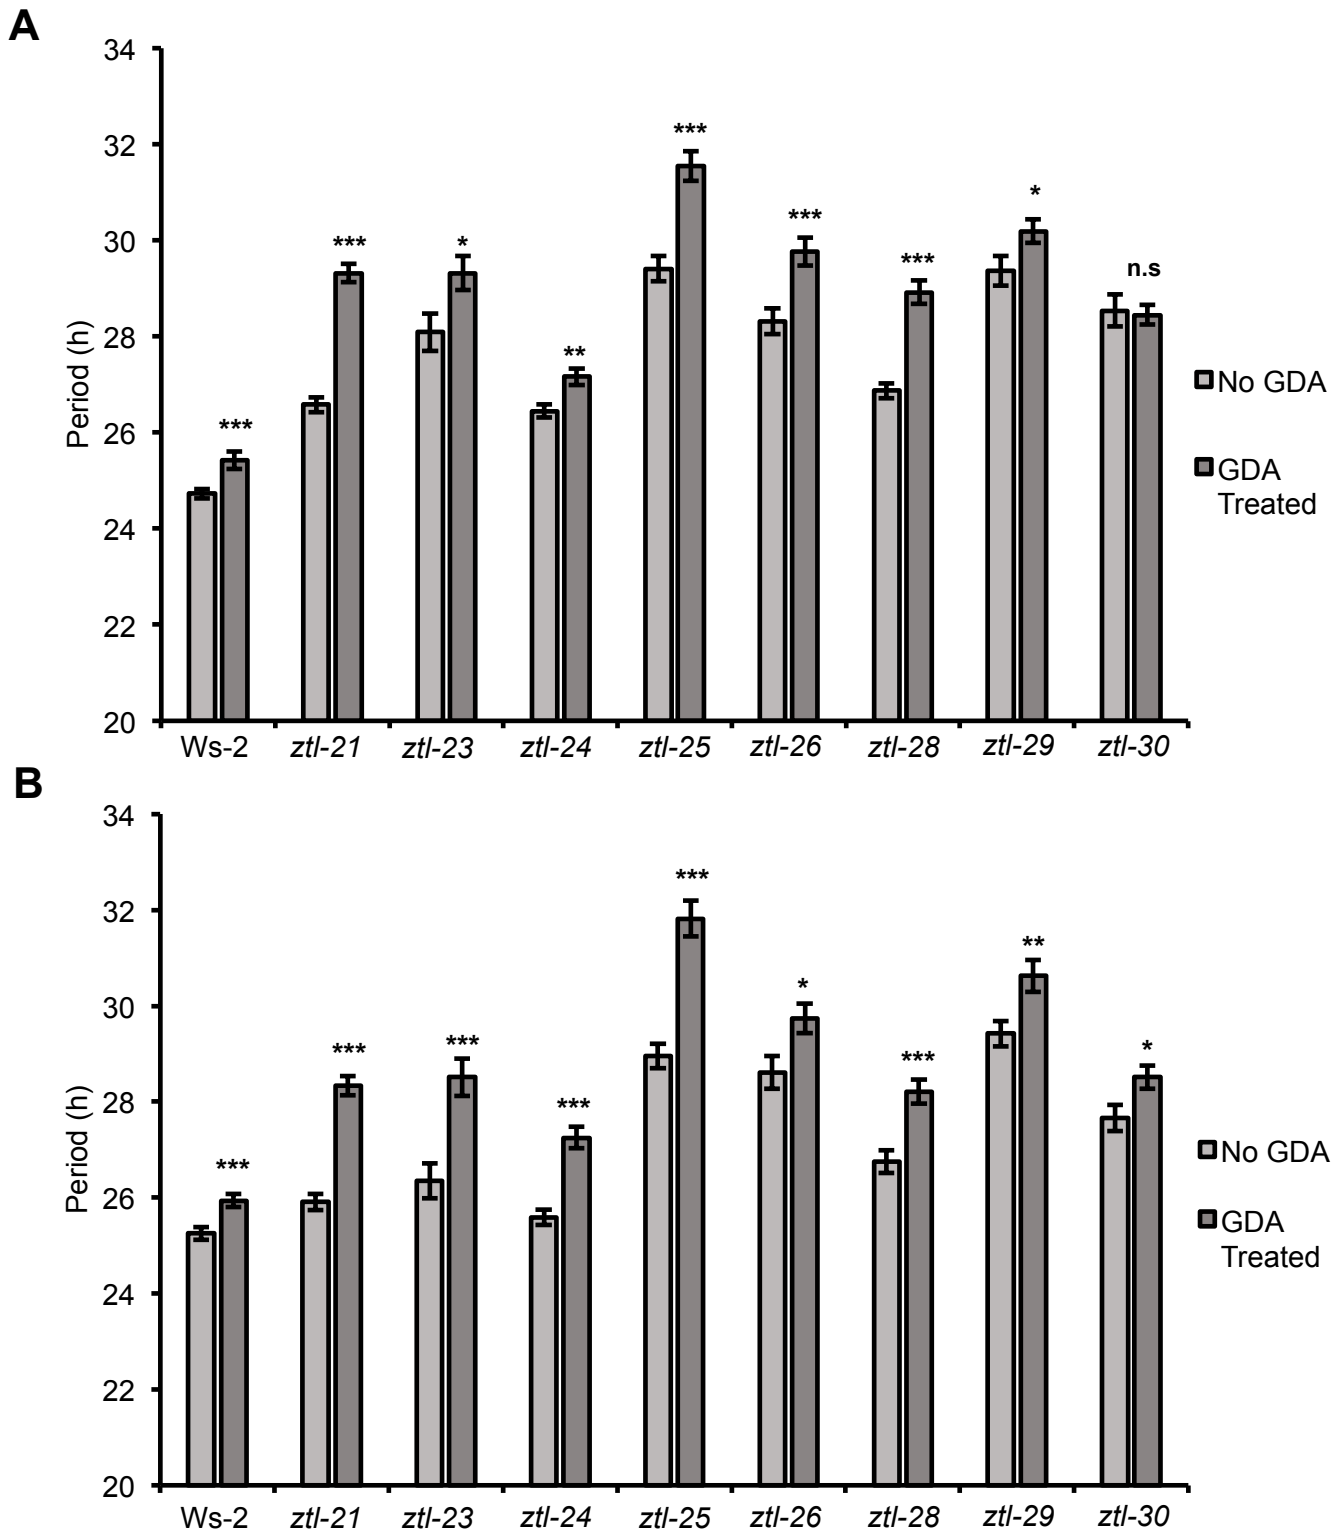

**Supplementary Figure 2 – Geldanamycin lengthens free-running period in a range of *ztl* mutants.** The period lengthening effect of geldanamycin on *CAB2::LUC* period was seen in both *Ws-2* and *ztl* mutants entrained under (A) light-dark and (B) warm-cold cycles. Geldanamycin was applied upon transfer to free-running conditions. In each instance, 48 individual seedlings were examined. For (A), *Ws-2* data is the same as that of supplementary figure 1A and for (A, B) the *ztl-21* data is the same as figure 2. \*  $p < 0.05$ , \*\*  $p < 0.01$ , \*\*\*  $p < 0.001$ , n.s. no significant difference. Significance determined by T test. Error bars represent SEM.
